# Supplementary material
Source: MDPI journal article supplement (https://www.mdpi.com/2076-3417/12/22/11685)
Supplement: s1 [file s1]

# Machine learning-based classification of mushrooms using a smartphone application

Jae Joong Lee<sup>1</sup>, Catherine Aime<sup>2</sup>, Bartek Rajwa<sup>3</sup>, and Euiwon Bae<sup>4\*</sup>

<sup>1</sup>*School of Computer Science*, <sup>2</sup>*Department of Plant and Botany Science*, <sup>3</sup>*Bindley Bioscience Center*, <sup>4</sup>*School of Mechanical Engineering, Purdue University, West Lafayette, Indiana 47907, USA*

\*Corresponding author: [ebae@purdue.edu](mailto:ebae@purdue.edu)

## Supplementary material

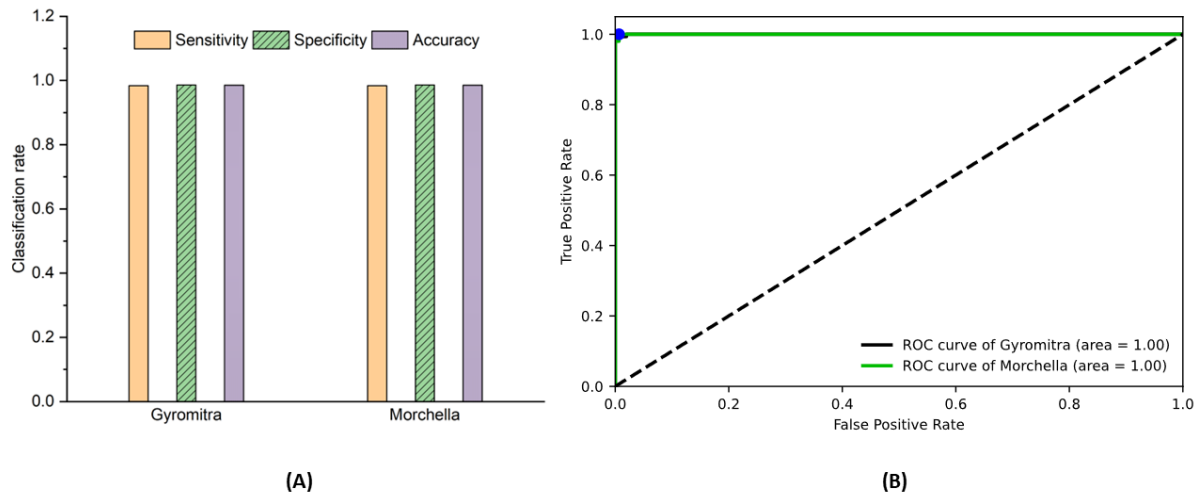

**Figure S1.** Comparison of sensitivity and specificity for the two classes of *Gyromitra* and *Morchella*. (A) classification rate from server-based training and (B) receiver operating curve.

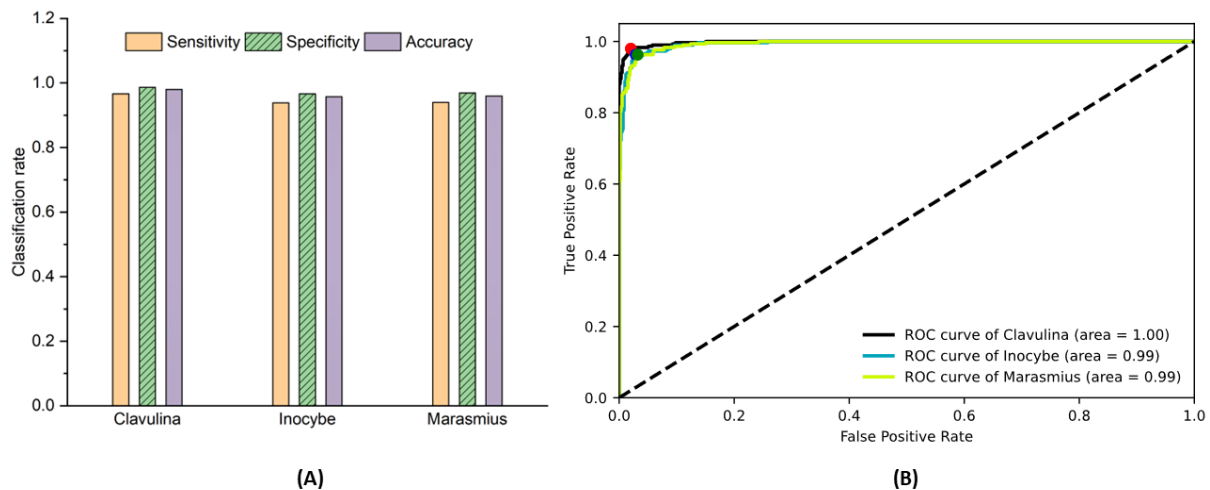

**Figure S2.** Comparison of sensitivity and specificity for the three classes of *Clavulina*, *Inocybe*, and *Marasmius*. (A) classification rate from server-based training and (B) receiver operating curve.

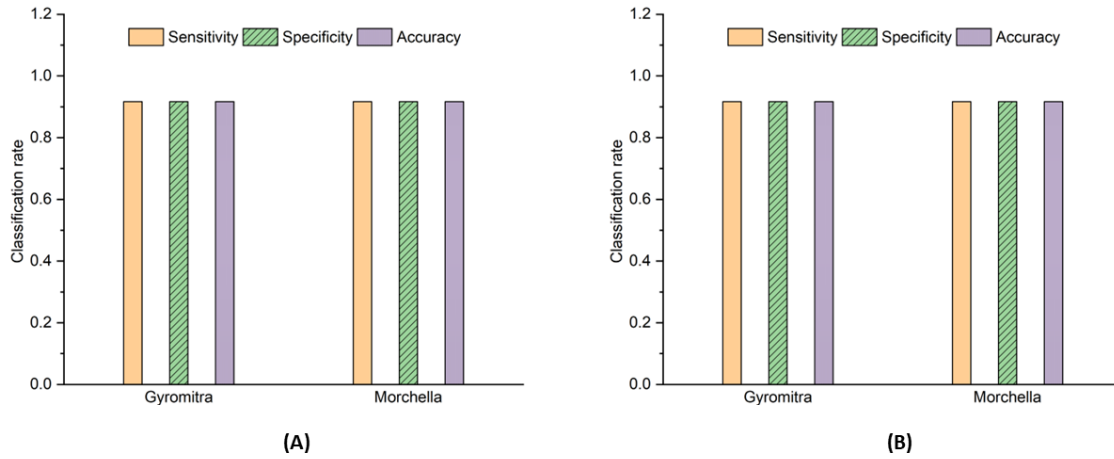

**Figure S3.** Comparison of sensitivity and specificity for the two classes of *Gyromitra* and *Morchella*. (A) classification rate from laptop training and testing. (B) test result from importing the trained model to the smartphone handset.

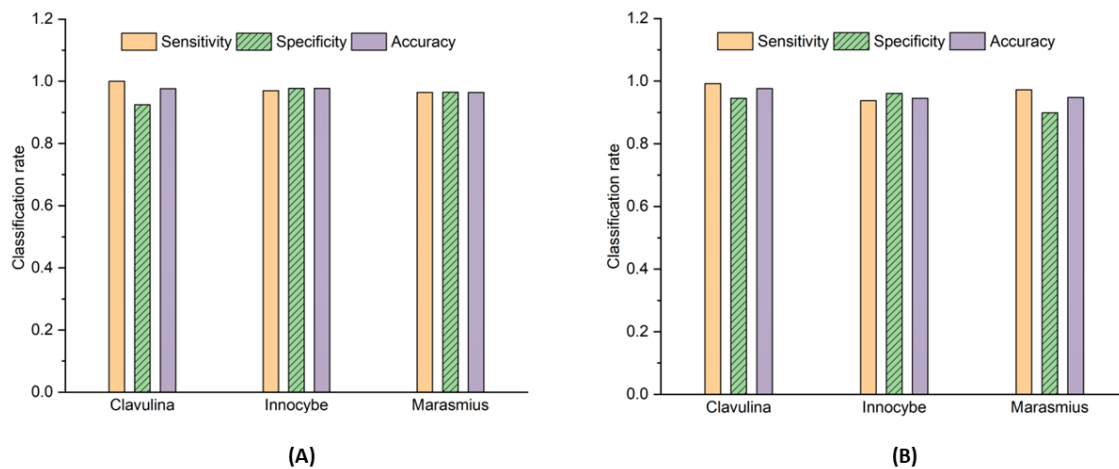

**Figure S4.** Comparison of sensitivity and specificity for *Clavulina*, *Inocybe*, and *Marasmius* classes. (A) classification rate from laptop training and testing. (B) test result from importing the trained model to the smartphone handset.

**Table S1.** Computed mean accuracies and confidence interval for classification performed using 2-, 3-, and 5-classes models.

In order to estimate the expected classifiers' performance, we used a generalized linear model with a binomial link, as shown in the equation below.

$$\log\left(\frac{P}{1-P}\right) = \alpha + \beta_1 C_1 + \dots + \beta_{n-1} C_{n-1}$$

where  $P$  is the accuracy of classification in each of the cross-validation runs,  $n$  is the number of groups/classes,  $\alpha$  is the intercept representing the log odds-ratio of correct classification of the easiest to classify group, and  $\beta_1$  to  $\beta_{n-1}$  are the coefficients of the model showing the increase (or decrease) in the classification odds.  $C_1$  to  $C_{n-1}$  encode the remaining classes. The table shows estimated marginal means, standard errors, and lower and upper confidence limits.

| <b>Classifier</b> | <b>Species</b>      | <b>Accuracy</b> | <b>SE</b> | <b>Lower CL</b> | <b>Upper CL</b> |
|-------------------|---------------------|-----------------|-----------|-----------------|-----------------|
| 2-class           | <i>Gyromitra</i>    | 0.986           | 0.00272   | 0.979           | 0.990           |
| 2-class           | <i>Morchella</i>    | 0.983           | 0.00295   | 0.976           | 0.988           |
| 3-class           | <i>Clavulina</i>    | 0.987           | 0.00188   | 0.982           | 0.990           |
| 3-class           | <i>Inocybe</i>      | 0.967           | 0.00296   | 0.960           | 0.972           |
| 3-class           | <i>Marasmius</i>    | 0.970           | 0.00281   | 0.964           | 0.975           |
| 5-class           | <i>Agaricus</i>     | 0.973           | 0.00346   | 0.966           | 0.979           |
| 5-class           | <i>Amanita</i>      | 0.982           | 0.00248   | 0.976           | 0.986           |
| 5-class           | <i>Cantharellus</i> | 0.984           | 0.00194   | 0.980           | 0.988           |
| 5-class           | <i>Pleurotus</i>    | 0.979           | 0.00242   | 0.974           | 0.983           |
| 5-class           | <i>Tricholoma</i>   | 0.958           | 0.00314   | 0.951           | 0.963           |

**Figure S5.** Comparison of the class accuracies in three different classifiers computed using 10× cross-validation. The red box indicated the mean, and lower and upper confidence intervals. Each point represents a single run of randomized cross-validation.

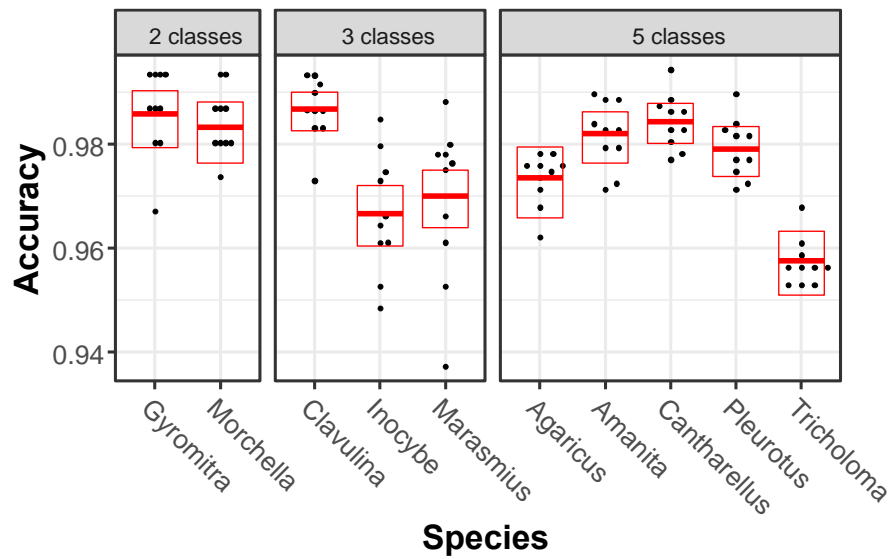

**Table S2.** Significance test results.

| Classifier | Comparison                                | Odds ratio | SE    | p-value |
|------------|-------------------------------------------|------------|-------|---------|
| 2-class    | <i>Gyromitra</i> vs. <i>Morchella</i>     | 1.188      | 0.313 | 0.512   |
| 3-class    | <i>Clavulina</i> vs. <i>Inocybe</i>       | 2.562      | 0.437 | <0.001  |
| 3-class    | <i>Clavulina</i> vs. <i>Marasmius</i>     | 2.305      | 0.399 | <0.001  |
| 3-class    | <i>Inocybe</i> vs. <i>Marasmius</i>       | 0.899      | 0.120 | 0.705   |
| 5-class    | <i>Agaricus</i> vs. <i>Amanita</i>        | 0.675      | 0.131 | 0.254   |
| 5-class    | <i>Agaricus</i> vs. <i>Cantharellus</i>   | 0.584      | 0.107 | 0.029   |
| 5-class    | <i>Agaricus</i> vs. <i>Pleurotus</i>      | 0.784      | 0.140 | 0.655   |
| 5-class    | <i>Agaricus</i> vs. <i>Tricholoma</i>     | 1.629      | 0.252 | 0.014   |
| 5-class    | <i>Amanita</i> vs. <i>Cantharellus</i>    | 0.865      | 0.163 | 0.938   |
| 5-class    | <i>Amanita</i> vs. <i>Pleurotus</i>       | 1.162      | 0.213 | 0.925   |
| 5-class    | <i>Amanita</i> vs. <i>Tricholoma</i>      | 2.412      | 0.386 | <0.001  |
| 5-class    | <i>Cantharellus</i> vs. <i>Pleurotus</i>  | 1.344      | 0.232 | 0.427   |
| 5-class    | <i>Cantharellus</i> vs. <i>Tricholoma</i> | 2.791      | 0.412 | <0.001  |
| 5-class    | <i>Pleurotus</i> vs. <i>Tricholoma</i>    | 2.076      | 0.293 | <0.001  |

The above-described model was used to compute comparisons between the classification accuracies achieved by the three evaluated classifiers. For multiple comparisons, the post-hoc statistical analysis utilized Tukey adjustment. The magnitude of the odds ratio reflects the strength of the relationship between the s and the proportion of correctly classified images. In the 2-class classifier, the results indicate that the expected accuracies for both classes are likely

to be identical. *Clavulina* is significantly easier to classify than the other two classes using the 3-class classifier. The 5-class classifier produces significantly less accurate results for the *Tricholoma* class, and significantly more accurate results for the *Cantharellus* class. Even though there are statistically significant differences in performance shown for some classes, the fact that even the worst noted accuracy exceeded 95% demonstrates that these differences may not have practical implications.
